# Supplementary material for: Optimized Extraction of Polyphenols from Unconventional Edible Plants: LC-MS/MS Profiling of Polyphenols, Biological Functions, Molecular Docking, and Pharmacokinetics Study
Source: MDPI journal article supplement (doi:10.3390/molecules28186703), 2023-09-19
Supplement: s1 [file s1]

*Supplementary Material*

Optimized Extraction of Polyphenols from Unconventional Edible Plants, LC-MS/MS Profiling of Polyphenols, Biological Functions, Molecular Docking and Pharmacokinetics Study

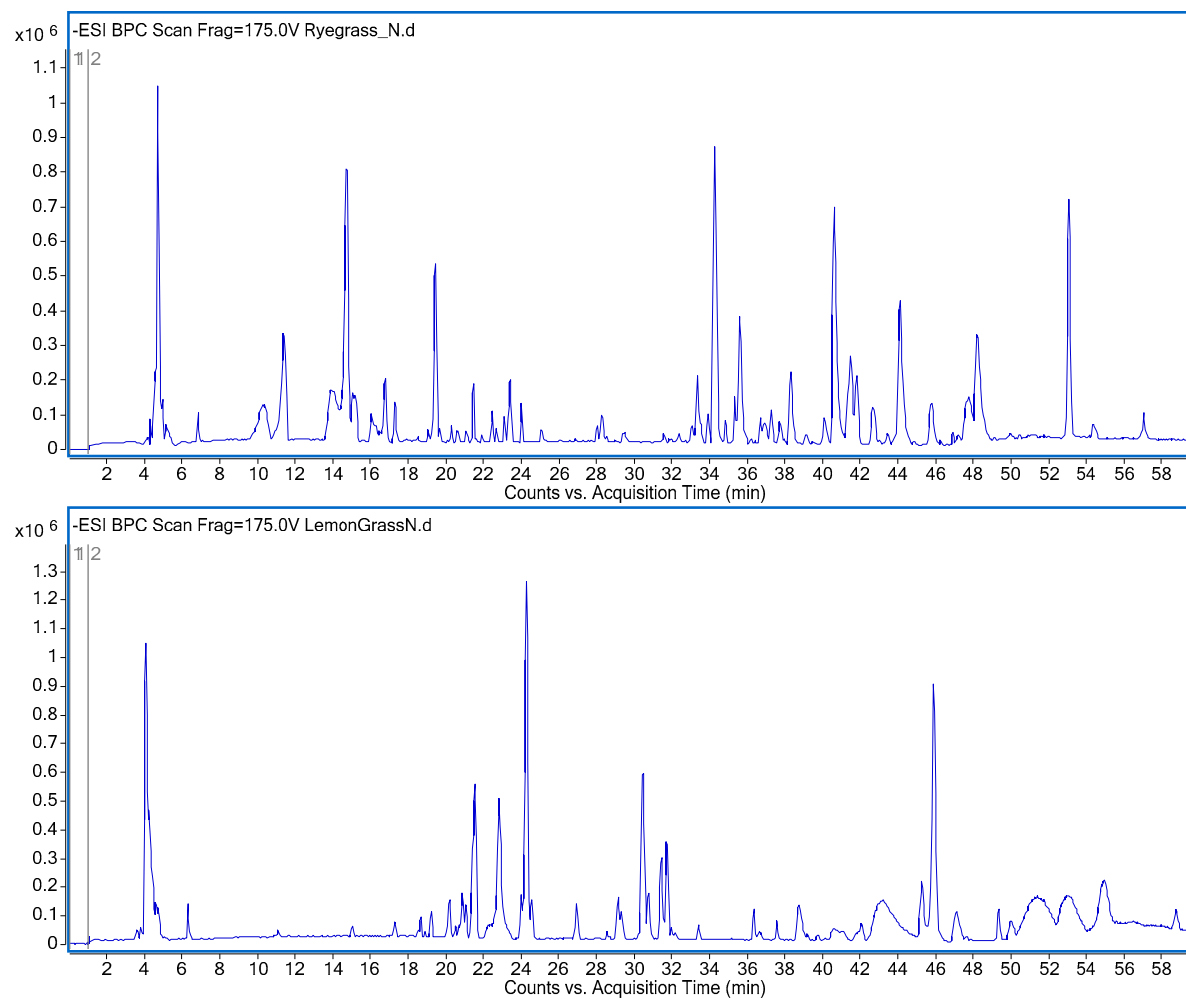

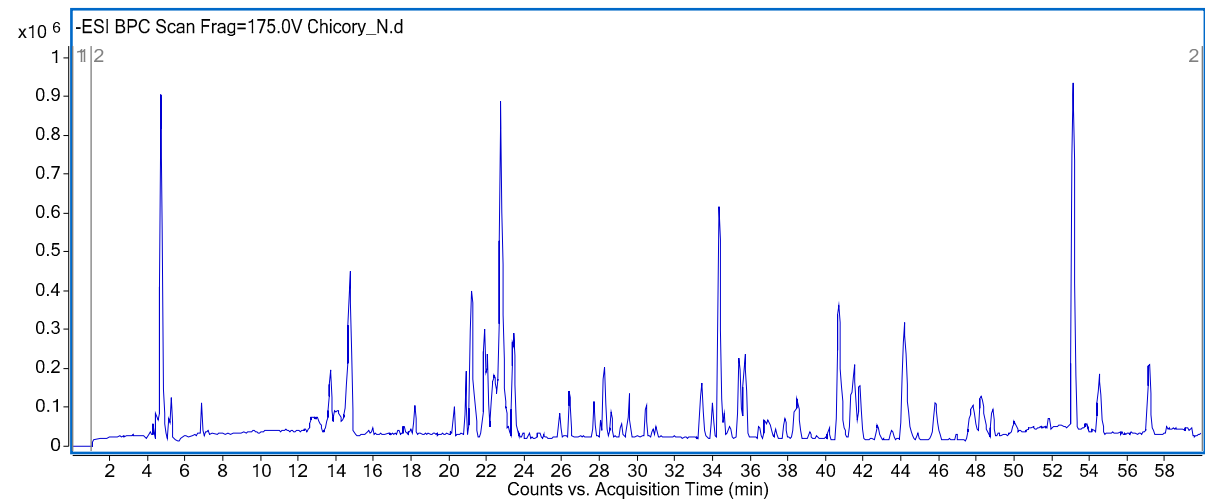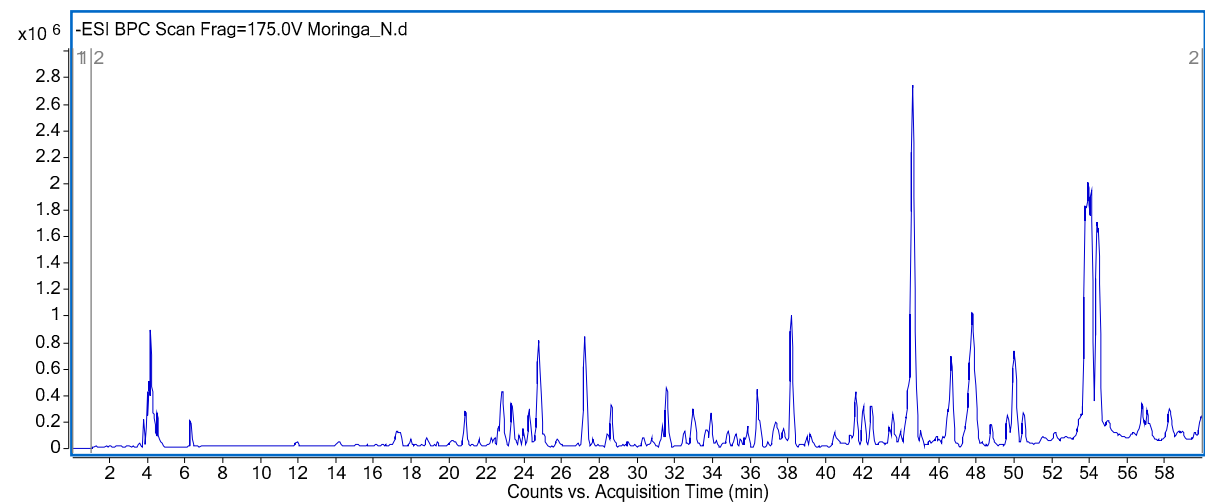

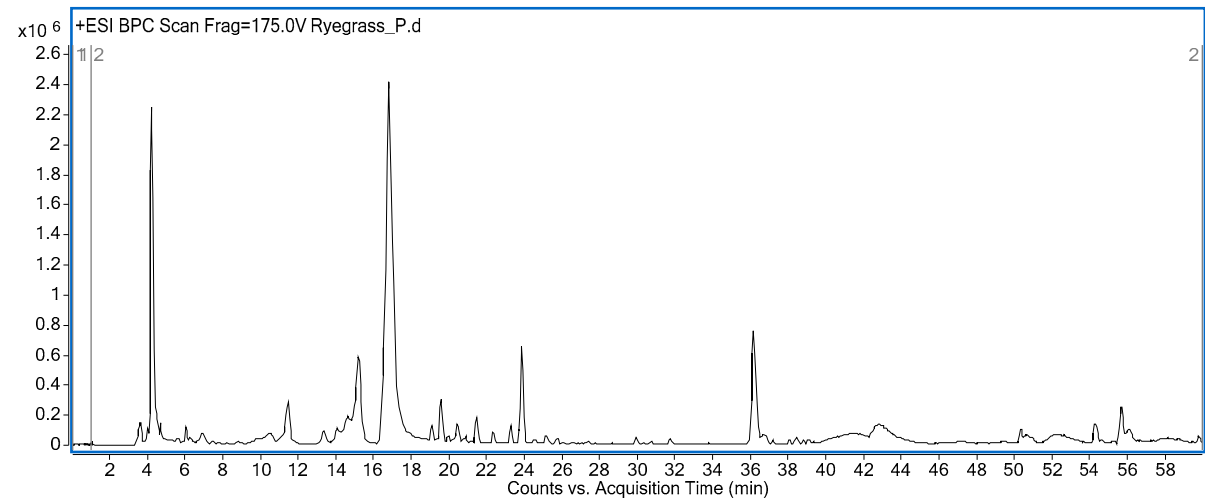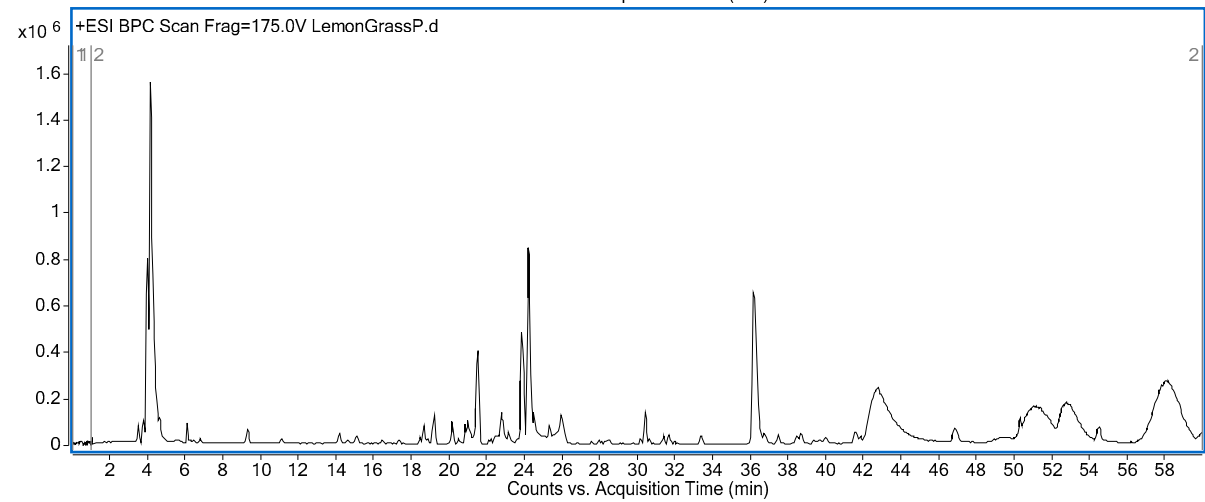

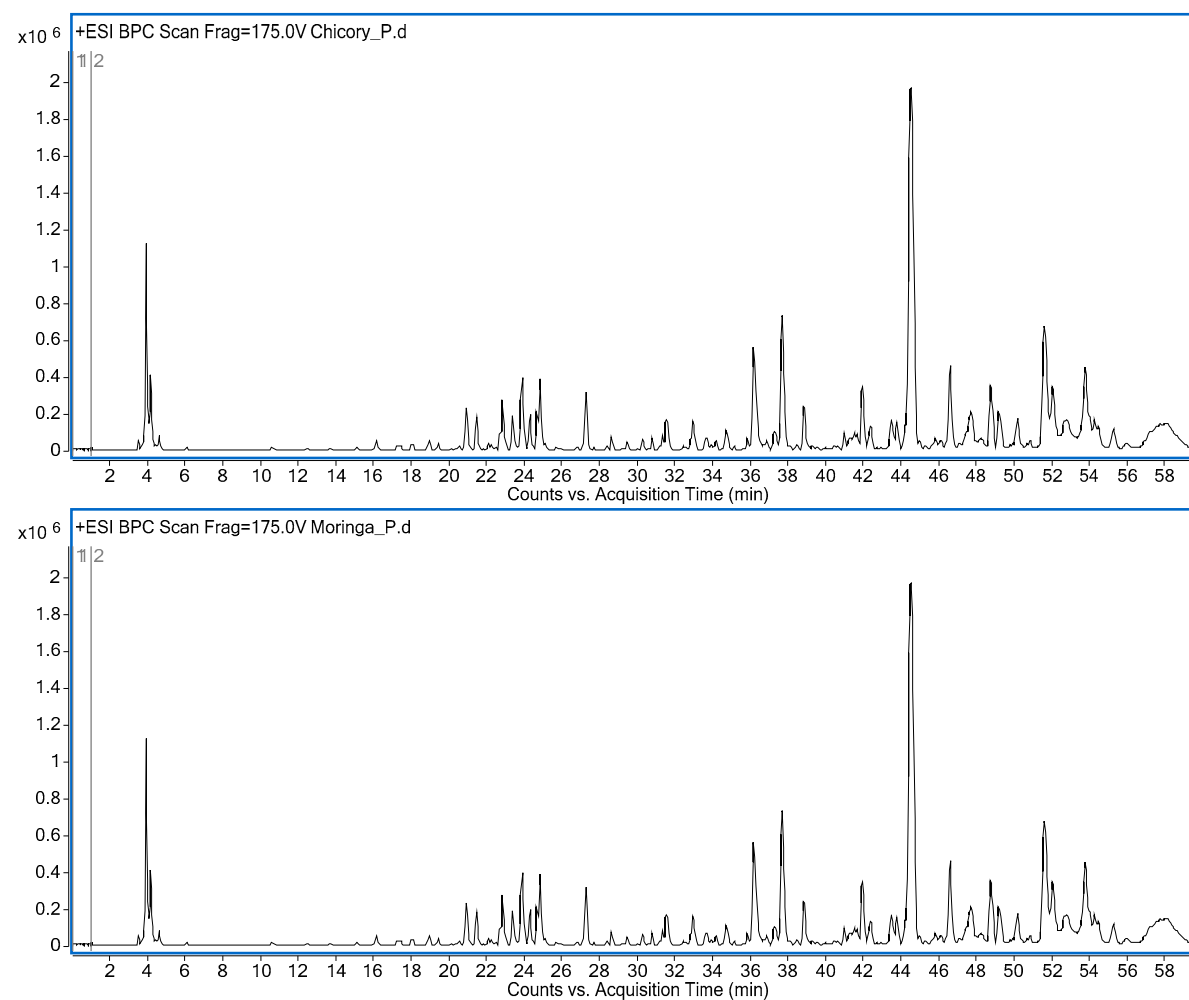

**Figure S1.** Base Peak chromatograms (BPC) of ryegrass, lemongrass, chicory and moringa in positive and negative modes

### Chicoric acid

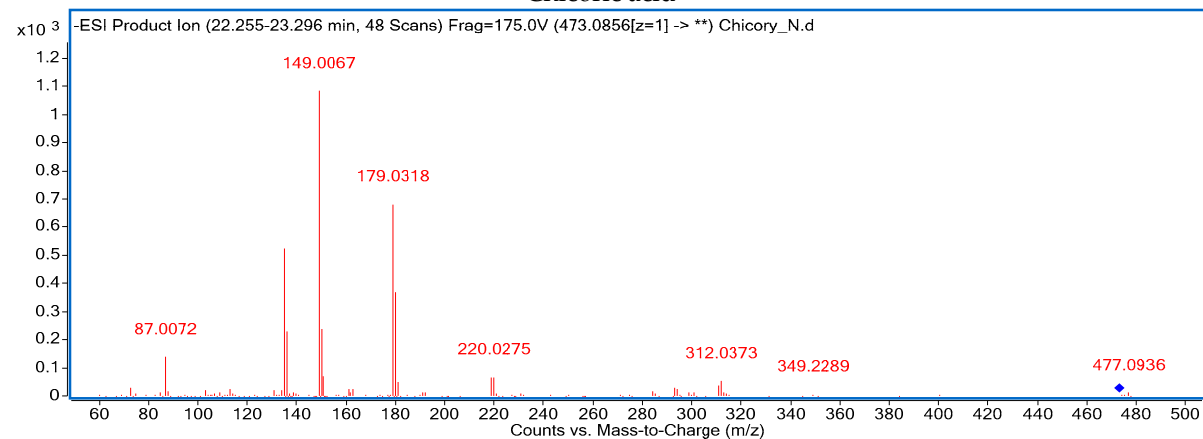

### Chlorogenic acid

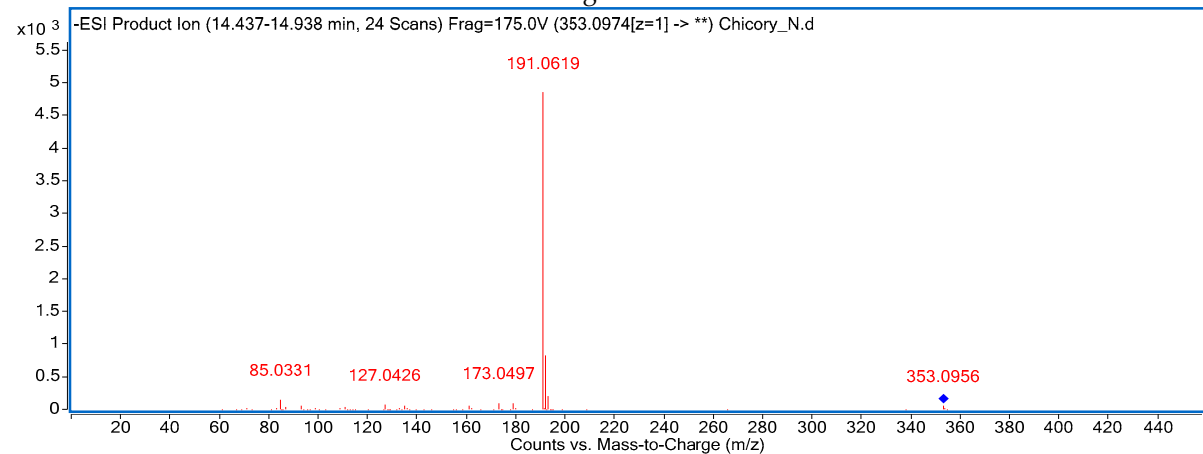

### Caffeic acid

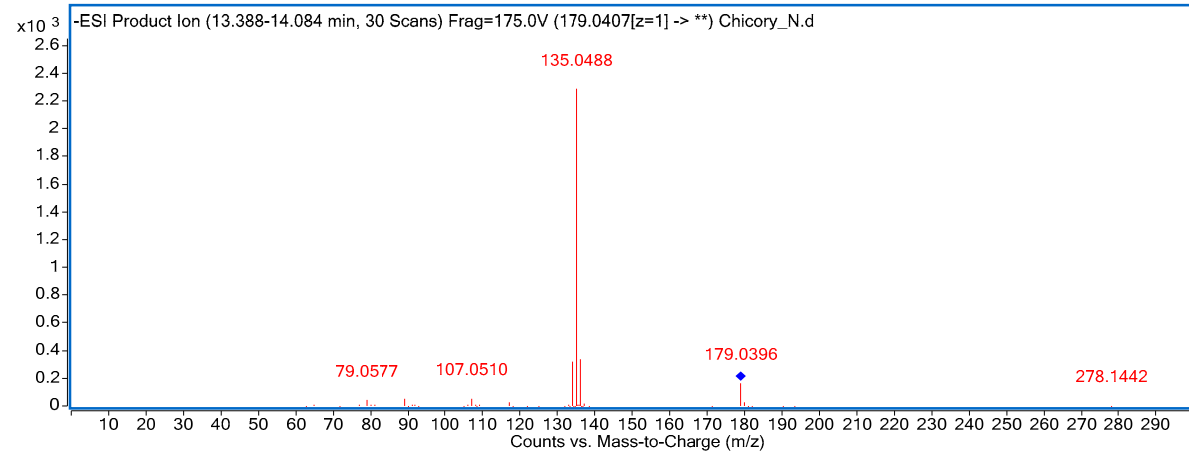

### Ferulic acid

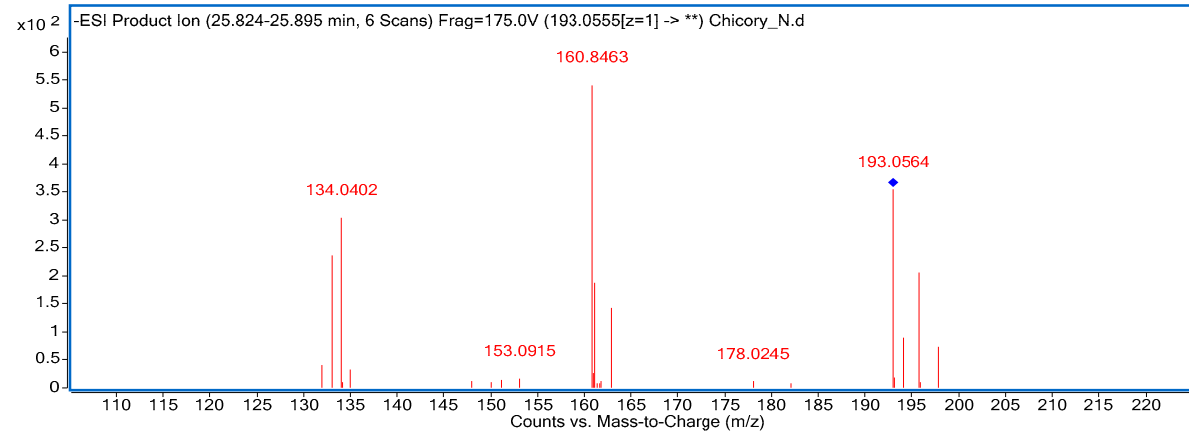

### Mellein

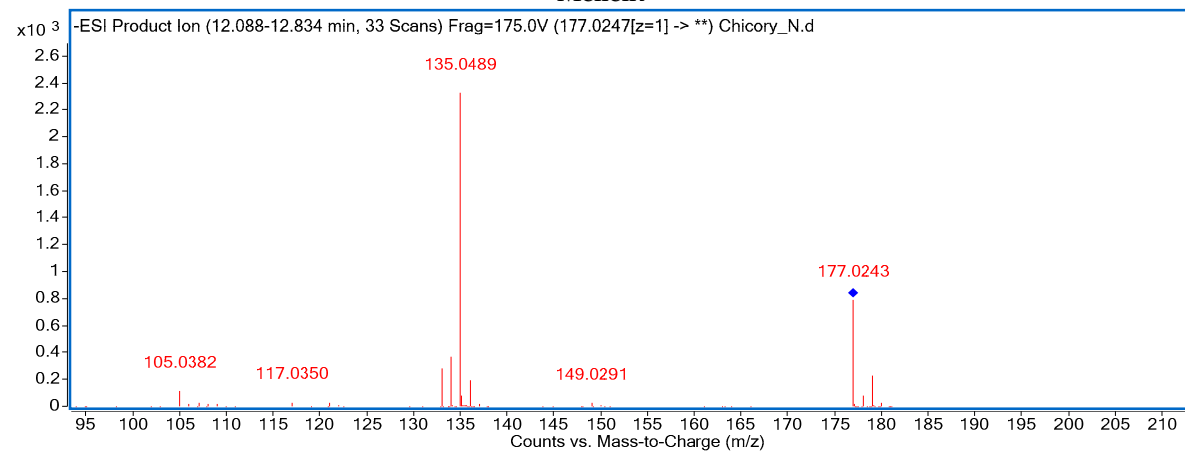

### p-hydroxybenzoic acid

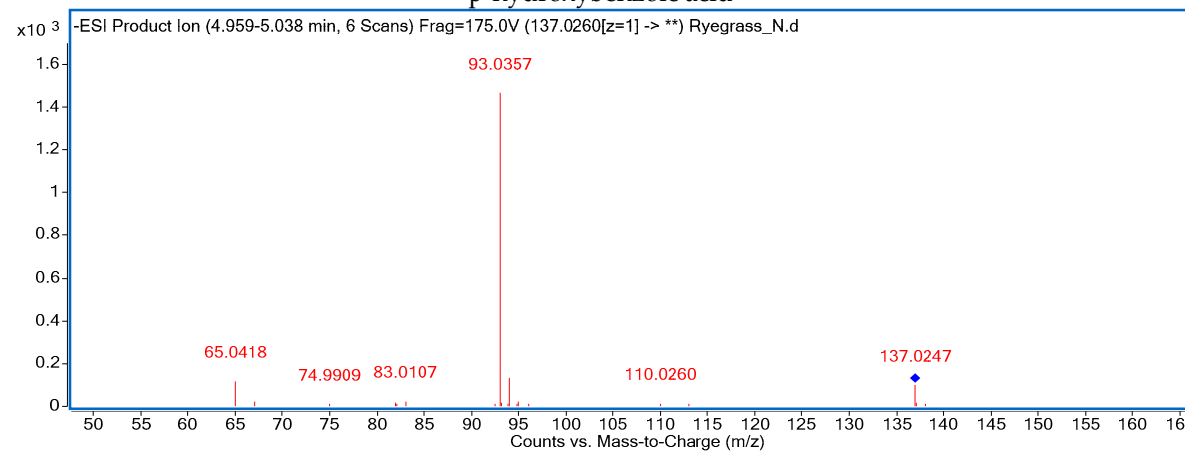

### Umbelliferone

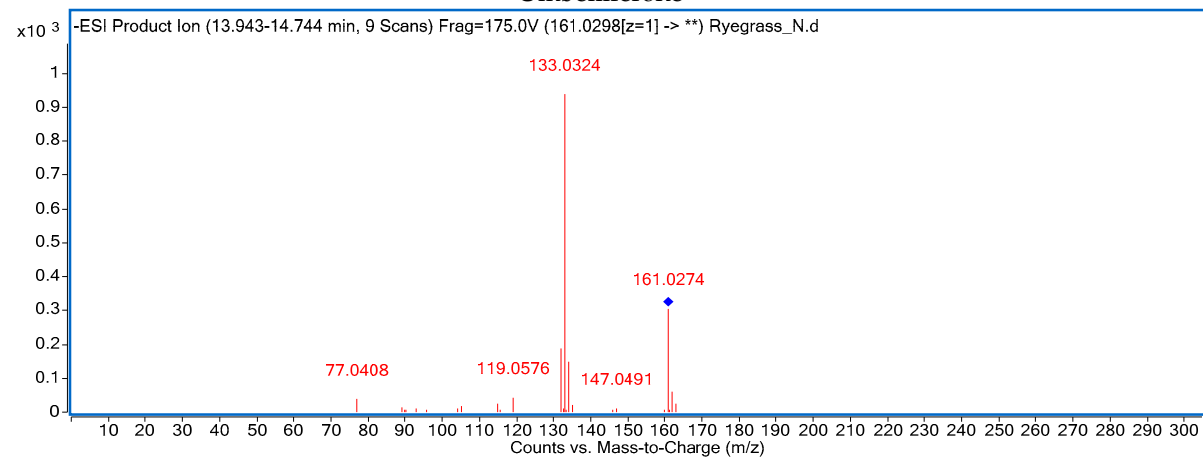

### Caffeic acid

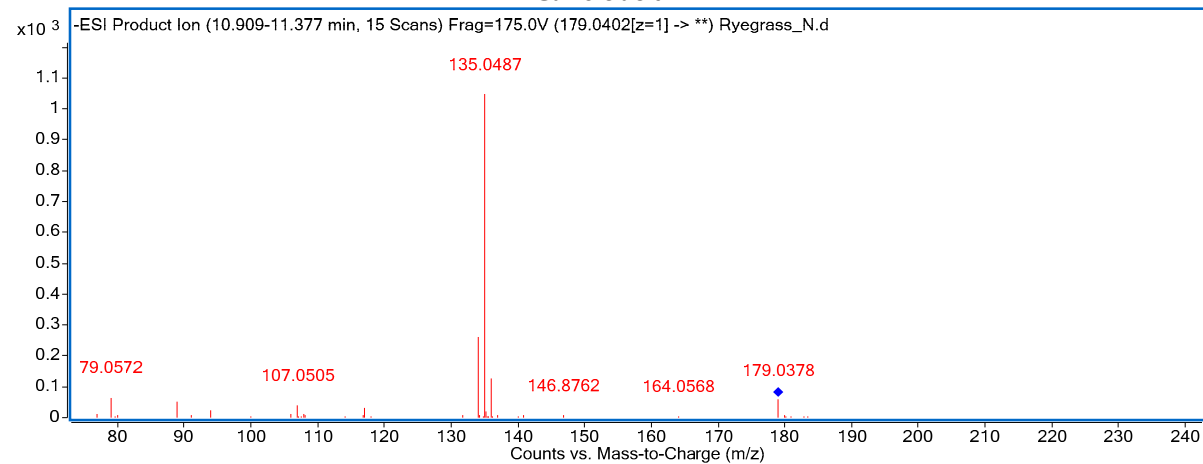

### Protocatechuic acid

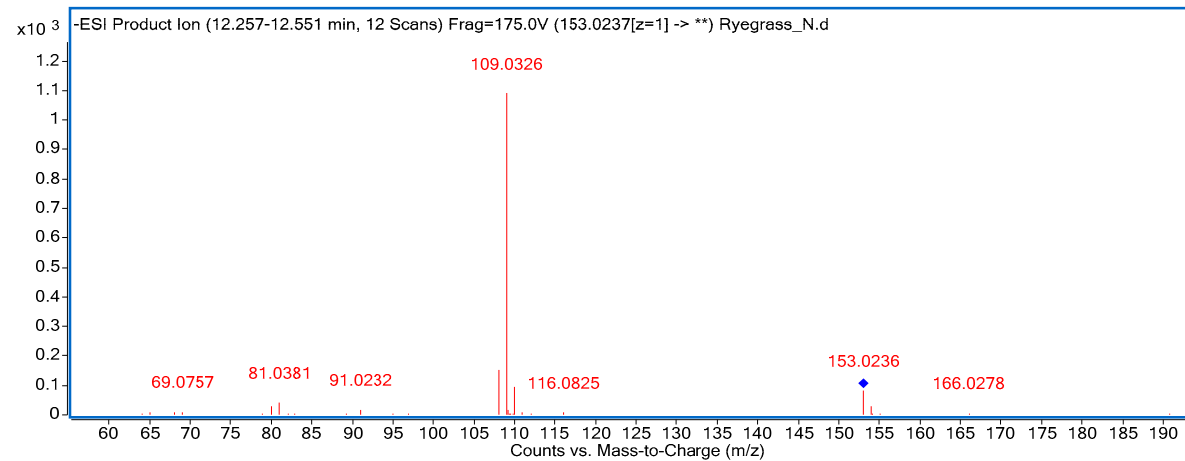

### 3-Feruloylquinic acid

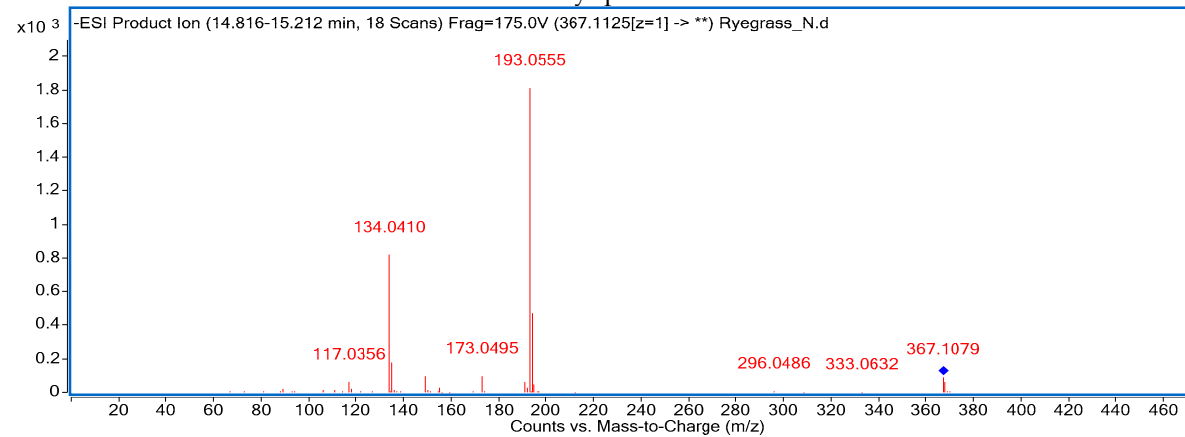

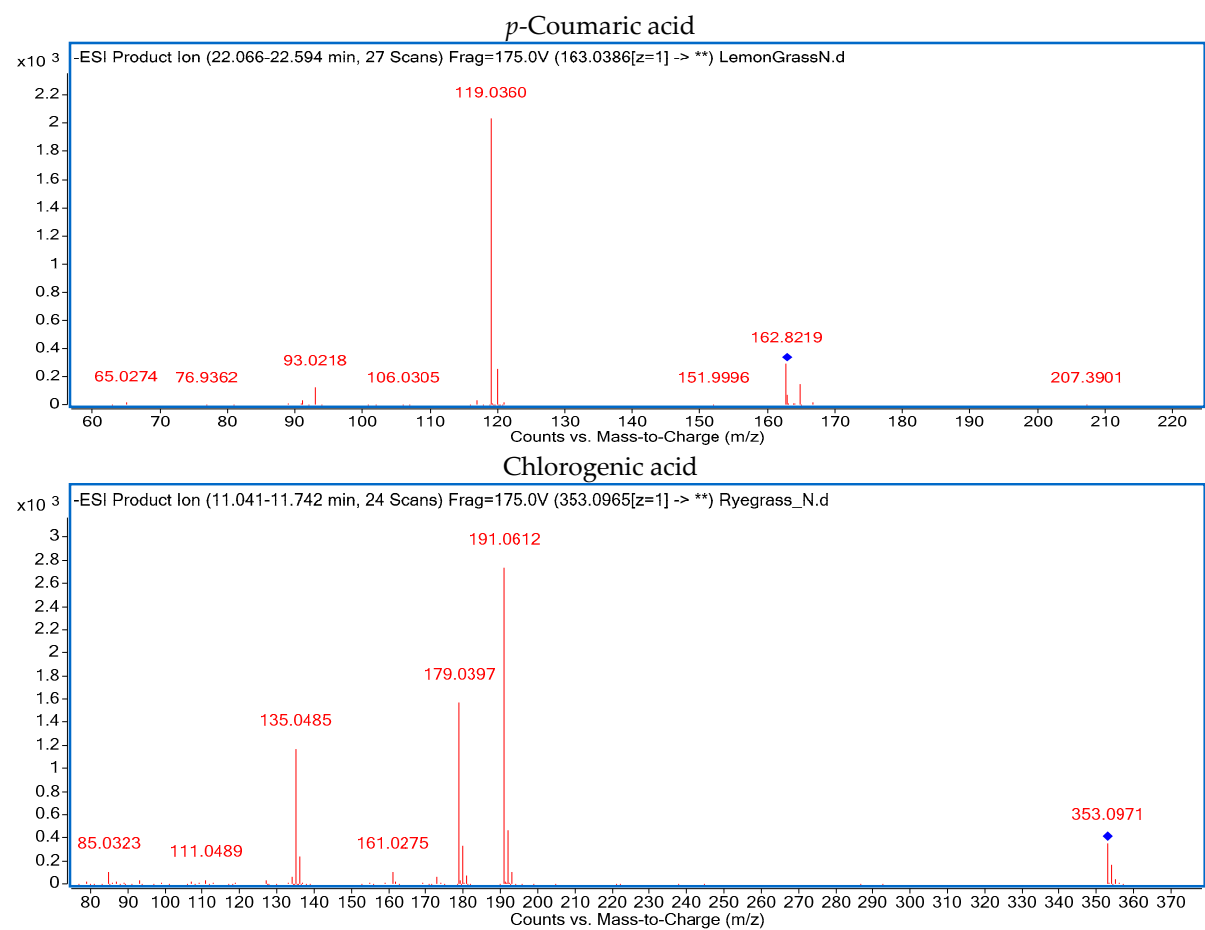

**Figure S2.** MS/MS spectra of some elected compounds in selected plants

**Table S1.** Quantification of abundant phenolic compounds (µg/g)

|    | <b>Compounds</b>              | <b>Lemon grass</b> | <b>Rye</b>     | <b>Chicory</b> | <b>Moringa</b> |
|----|-------------------------------|--------------------|----------------|----------------|----------------|
| 1  | Gallic Acid                   | 11.01 ± 0.22       | 14.41 ± 1.72   | 23.59 ± 2.04   | 17.32 ± 1.79   |
| 2  | Rosmarinic Acid               |                    | 21.52 ± 1.65   | 72.36 ± 1.47   | 748.32 ± 25.82 |
| 3  | <i>p</i> -hydroxybenzoic acid | 36.13 ± 0.73       | 75.92 ± 5.67   |                |                |
| 4  | Cinnamic acid                 | 91.38 ± 8.87       |                | 17.71 ± 1.18   | 31.32 ± 5.06   |
| 5  | <i>p</i> -coumaric acid       | 244.63 ± 21.43     |                | 154.90 ± 12.62 | 17.61 ± 6.37   |
| 6  | Ferulic acid                  | 3.45 ± 0.61        |                | 189.41 ± 15.08 | 42.15 ± 4.96   |
| 7  | 3-Caffeoylquinic acid         | 341.52 ± 23.09     | 445.62 ± 31.52 |                | 103.93 ± 12.51 |
| 8  | Caffeic acid                  | 366.78 ± 14.77     |                | 245.67 ± 21.55 | 264.05 ± 11.54 |
| 9  | Chicoric acid                 |                    | 15.82 ± 1.59   | 286.12 ± 31.27 |                |
| 10 | Sinapic acid                  | 176.99 ± 4.76      | 51.05 ± 5.12   | 177.65 ± 5.43  |                |
| 11 | Protocatechuic acid           | 24.72 ± 1.94       | 63.14 ± 3.58   |                | 44.09 ± 3.04   |
| 12 | Epicatechin                   | 68.36 ± 0.44       |                |                | 168.82 ± 8.67  |
| 13 | Procyanidin B2                | 44.62 ± 6.32       |                |                | 68.76 ± 4.12   |
| 14 | Diosmin                       | 16.48 ± 1.06       | 132.63 ± 11.06 |                | 9.51 ± 1.43    |
| 15 | Pyrogallol                    | 42.01 ± 77.74      |                | 111.5 ± 3.01   | 9.43± 1.31     |
| 16 | Coumarin                      | 17.3 ± 6.17        |                |                | 31.42 ± 2.89   |
| 17 | 3-Sinapoylquinic acid         | 96.32 ± 1.52       | 73.51 ± 3.83   | 70.88 ± 4.75   | 125.23 ± 19.42 |
| 18 | Scopoletin                    |                    |                | 55.9 ± 5.57    | 13.73 ± 2.03   |
| 19 | Umbelliferone                 |                    | 23.43 ±4.14    |                | 53.15 ± 6.82   |
| 20 | Naringin                      | 94.29 ± 0.93       |                |                | 11.03 ± 1.04   |
| 21 | Carnosol                      |                    |                |                | 27.32 ± 1.94   |
| 22 | Carnosic acid                 |                    |                |                | 32.53 ± 3.82   |

**Table S2.** The calculated binding energies of phenolic compounds

| No. | compounds                 | Binding energies |
|-----|---------------------------|------------------|
| 1   | Punicafolin               | -12.16           |
| 2   | Rutin                     | -11.14           |
| 3   | Acarbose                  | -11.05           |
| 4   | Procyanidin B2            | -10.95           |
| 5   | Myricitrin                | -10.59           |
| 6   | 3-Feruloylquinic acid     | -10.32           |
| 7   | Taxifolin                 | -10.13           |
| 8   | Diosmin                   | -9.84            |
| 9   | quercitrin                | -9.72            |
| 10  | Chlorogenic acid          | -9.62            |
| 11  | Quercetin-3-O-arabinoside | -9.49            |
| 12  | Naringin                  | -9.40            |
| 13  | 3-p-Coumaroylquinic acid  | -9.35            |
| 14  | Myricetin                 | -9.28            |
| 15  | Quercetin                 | -6.95            |
| 16  | Isorhamnetin              | -6.68            |
| 17  | Quinic acid               | -6.65            |
| 18  | Luteolin                  | -6.52            |
| 19  | (-)-Epicatechin           | -5.36            |
| 20  | Hesperetin                | -6.28            |
| 21  | Gallic acid               | -6.14            |
| 22  | Quinic acid               | -6.05            |
| 23  | 3-O-sinapoylquinic acid   | -5.91            |
| 24  | Diosmetin                 | -5.36            |
| 25  | Naringenin                | -5.33            |
| 26  | p-Hydroxybenzoic acid     | -5.30            |
| 27  | Salicylic acid            | -5.20            |
| 28  | Caffeic acid              | -5.08            |
| 29  | <i>p</i> -coumaric acid   | -4.80            |

|    |                         |       |
|----|-------------------------|-------|
| 30 | Pyrogallol              | -4.74 |
| 31 | Chrysin                 | -4.19 |
| 32 | Protocatechuic acid     | -4.12 |
| 33 | 3-4-5-Trimethoxyflavone | -4.09 |
| 34 | Cinnamic acid           | -4.04 |
| 35 | Coumarin                | -3.93 |

**Table S3.** Predicted absorption and distribution of selected compounds.

|    | <b>Compounds</b>                  | Water solubility | Caco2 permeability | Intestinal absorption (human) | Skin Permeability | P-glycoprotein substrate | P-glycoprotein I inhibitor | P-glycoprotein II inhibitor | VDss (human) | Fraction unbound (human) | BBB permeability | CNS permeability |
|----|-----------------------------------|------------------|--------------------|-------------------------------|-------------------|--------------------------|----------------------------|-----------------------------|--------------|--------------------------|------------------|------------------|
| 1  | Gallic acid                       | -2.56            | -0.081             | 43.374                        | -2.735            | No                       | No                         | No                          | -1.855       | 0.617                    | -1.102           | -3.74            |
| 2  | Protocatechuic acid               | -2.069           | 0.49               | 71.174                        | -2.727            | No                       | No                         | No                          | -1.298       | 0.648                    | -0.683           | -3.305           |
| 3  | Protocatechuic acid 4-O-glucoside | -2.372           | -0.733             | 15.09                         | -2.735            | No                       | No                         | No                          | -0.728       | 0.725                    | -1.297           | -4.056           |
| 4  | Caffeic acid                      | -2.33            | 0.634              | 69.407                        | -2.722            | No                       | No                         | No                          | -1.098       | 0.529                    | -0.647           | -2.608           |
| 5  | Piceatannol                       | -3.227           | 0.878              | 88.197                        | -2.735            | Yes                      | No                         | No                          | 0.438        | 0.237                    | -0.776           | -2.257           |
| 6  | Rosmarinic acid                   | -3.059           | -0.937             | 32.516                        | -2.735            | Yes                      | No                         | No                          | 0.393        | 0.348                    | -1.378           | -3.347           |
| 7  | p-Hydroxybenzoic acid             | -1.877           | 1.151              | 83.961                        | -2.723            | No                       | No                         | No                          | -1.557       | 0.592                    | -0.334           | -3.21            |
| 8  | p-Coumaric acid                   | -2.378           | 1.21               | 93.494                        | -2.715            | No                       | No                         | No                          | -1.151       | 0.428                    | -0.225           | -2.418           |
| 9  | p-Coumaric acid 4-O-glucoside     | -2.393           | -0.585             | 14.12                         | -2.735            | No                       | No                         | No                          | -0.718       | 0.627                    | -1.076           | -3.851           |
| 10 | Kaempferol 3-O-                   | -2.866           | -0.884             | 25.165                        | -2.735            | Yes                      | No                         | No                          | 1.295        | 0.28                     | -1.441           | -3.955           |

|    |                                      |        |        |        |        |     |     |     |        |       |        |        |
|----|--------------------------------------|--------|--------|--------|--------|-----|-----|-----|--------|-------|--------|--------|
|    | glucuronide                          |        |        |        |        |     |     |     |        |       |        |        |
| 11 | Cinnamic acid                        | -2.608 | 1.717  | 94.833 | -2.695 | No  | No  | No  | -1.051 | 0.38  | 0.446  | -1.834 |
| 12 | Coumarin                             | -1.517 | 1.649  | 97.344 | -1.921 | No  | No  | No  | -0.143 | 0.367 | -0.007 | -1.926 |
| 13 | Procyanidin trimer C1                | -2.892 | -1.826 | 60.469 | -2.735 | Yes | No  | Yes | -0.086 | 0.378 | -2.843 | -4.855 |
| 14 | Rosmanol                             | -3.606 | 1.015  | 93.407 | -2.772 | Yes | Yes | No  | 0.653  | 0.109 | -0.581 | -2.101 |
| 15 | Carnosol                             | -4.116 | 0.572  | 91.206 | -2.887 | Yes | Yes | No  | 0.819  | 0.044 | -0.096 | -1.816 |
| 16 | Carnosic acid                        | -3.224 | 0.803  | 99.03  | -2.735 | No  | No  | No  | -1.027 | 0.048 | -0.545 | -1.998 |
| 17 | Diosmin                              | -2.929 | 0.305  | 29.319 | -2.735 | Yes | No  | No  | 1.428  | 0.105 | -1.795 | -4.836 |
| 18 | Hesperidin                           | -3.014 | 0.505  | 31.481 | -2.735 | Yes | No  | No  | 0.996  | 0.101 | -1.715 | -4.807 |
| 19 | Mellein                              | -1.359 | 1.209  | 93.672 | -2.563 | No  | No  | No  | 0.166  | 0.476 | -0.216 | -2.284 |
| 20 | Nobiletin                            | -4.949 | 1.306  | 98.921 | -2.715 | No  | Yes | Yes | -0.281 | 0.179 | -1.254 | -3.142 |
| 21 | Scopoletin                           | -2.504 | 1.184  | 95.277 | -2.944 | No  | No  | No  | 0.034  | 0.363 | -0.299 | -2.32  |
| 22 | Secoisolariciresinol<br>sesquilignan | -3.377 | -0.237 | 61.217 | -2.735 | Yes | Yes | Yes | -0.412 | 0     | -1.78  | -3.892 |
| 23 | Matairesinol                         | -3.685 | 1.115  | 93.527 | -2.77  | Yes | Yes | Yes | -0.265 | 0     | -0.49  | -3.071 |
| 24 | Lariciresinol                        | -3.984 | 1.035  | 91.656 | -2.818 | Yes | No  | No  | -0.153 | 0     | -0.834 | -3.093 |
| 25 | Lariciresinol-<br>sesquilignan       | -4.143 | -0.432 | 75.194 | -2.735 | Yes | Yes | Yes | -0.31  | 0     | -1.475 | -3.662 |
| 26 | Epicatechin                          | -3.117 | -0.283 | 68.829 | -2.735 | Yes | No  | No  | 1.027  | 0.235 | -1.054 | -3.298 |
| 27 | Gallocatechin                        | -2.969 | -0.375 | 54.128 | -2.735 | Yes | No  | No  | 1.301  | 0.274 | -1.377 | -3.507 |
| 28 | 1,2-<br>Diferuloylgentiobiose        | -2.768 | -0.85  | 29.394 | -2.735 | Yes | Yes | No  | 0.424  | 0.157 | -2.011 | -4.856 |
| 29 | 3,7-Dimethylquercetin                | -1.991 | -0.656 | 43.925 | -2.735 | Yes | No  | No  | 0.034  | 0.612 | -1.16  | -3.693 |
| 30 | 3-Caffeoylquinic acid                | -3.349 | -0.351 | 84.383 | -2.735 | Yes | No  | Yes | 0.221  | 0.094 | -1.408 | -3.188 |
| 31 | 3-Feruloylquinic acid                | -2.55  | -0.564 | 44.764 | -2.735 | Yes | No  | No  | -1.303 | 0.392 | -1.273 | -3.943 |
| 32 | 3-p-Coumaroylquinic<br>acid          | -1.991 | -0.656 | 43.925 | -2.735 | Yes | No  | No  | 0.034  | 0.612 | -1.16  | -3.693 |
| 33 | 3-Sinapoylquinic acid                | -2.547 | -0.611 | 39.646 | -2.735 | Yes | No  | No  | -1.13  | 0.462 | -1.396 | -4.024 |
| 34 | 6"-O-Malonylgenistin                 | -2.88  | -1.101 | 13.775 | -2.735 | Yes | No  | No  | 0.208  | 0.259 | -1.667 | -3.971 |
| 35 | 6"-O-Malonylglycitin                 | -3.095 | -0.762 | 30.329 | -2.735 | Yes | No  | No  | -0.083 | 0.145 | -1.712 | -4.259 |
| 36 | Caffeic acid 4-O-<br>glucuronide     | -2.712 | -0.801 | 0      | -2.735 | Yes | No  | No  | -0.447 | 0.654 | -1.204 | -4.15  |
| 37 | Daidzein 7-O-                        | -2.854 | -0.552 | 36.73  | -2.735 | Yes | No  | No  | -0.286 | 0.277 | -1.145 | -3.631 |

|    |                                   |        |        |        |        |     |     |     |        |       |        |        |
|----|-----------------------------------|--------|--------|--------|--------|-----|-----|-----|--------|-------|--------|--------|
|    | glucuronide                       |        |        |        |        |     |     |     |        |       |        |        |
| 38 | Equol 7-O-glucuronide             | -2.963 | -0.537 | 33.172 | -2.735 | Yes | No  | No  | -0.266 | 0.312 | -0.836 | -3.827 |
| 39 | Esculin                           | -2.031 | 0.277  | 46.087 | -2.749 | Yes | No  | No  | -0.146 | 0.488 | -1.255 | -3.89  |
| 40 | Ferulic acid                      | -2.817 | 0.176  | 93.685 | -2.72  | No  | No  | No  | -1.367 | 0.343 | -0.239 | -2.612 |
| 41 | Glycitein 7-O-glucuronide         | -3.011 | -0.612 | 25.769 | -2.735 | Yes | No  | No  | -0.209 | 0.151 | -1.39  | -4.021 |
| 42 | Kaempferide                       | -3.238 | 0.326  | 79.898 | -2.735 | Yes | No  | No  | 0.709  | 0.068 | -0.954 | -2.316 |
| 43 | Medioresinol                      | -3.453 | 1.241  | 91.403 | -2.777 | Yes | Yes | Yes | 0.21   | 0.021 | -0.554 | -3.037 |
| 44 | Myricetin 3-O-rhamnoside          | -2.892 | -0.982 | 43.334 | -2.735 | Yes | No  | No  | 1.552  | 0.182 | -1.811 | -4.376 |
| 45 | Naringin                          | -2.919 | -0.658 | 25.796 | -2.735 | Yes | No  | No  | 0.619  | 0.159 | -1.6   | -4.773 |
| 46 | Neoerioditrin                     | -2.9   | -0.855 | 16.143 | -2.735 | Yes | No  | No  | 0.827  | 0.178 | -1.836 | -4.925 |
| 47 | Procyanidin B2                    | -2.892 | -1.225 | 66.749 | -2.735 | Yes | Yes | Yes | -0.158 | 0.309 | -1.94  | -3.983 |
| 48 | Pyrogallol                        | -1.408 | 1.122  | 83.549 | -2.751 | No  | No  | No  | 0.13   | 0.712 | -0.441 | -3.252 |
| 49 | Quercetin 3-O-xylosyl-glucuronide | -2.882 | -1.274 | 39.35  | -2.735 | Yes | No  | No  | 1.563  | 0.22  | -2.051 | -4.894 |
| 50 | Rhoifolin                         | -2.862 | -0.942 | 24.308 | -2.735 | Yes | No  | No  | 1.14   | 0.152 | -1.702 | -4.798 |
| 51 | Salvianolic acid B                | -2.892 | -1.57  | 9.902  | -2.735 | Yes | No  | No  | -0.078 | 0.214 | -2.491 | -4.187 |
| 52 | Salvianolic acid C                | -2.911 | -1.397 | 41.447 | -2.735 | Yes | No  | No  | -0.4   | 0.069 | -1.86  | -3.394 |
| 53 | Sinapic acid                      | -2.869 | 0.272  | 93.064 | -2.725 | Yes | No  | No  | -1.11  | 0.45  | -0.247 | -2.663 |
| 54 | Taxifolin 4',7-diglucoside        | -2.616 | -1.164 | 0      | -2.735 | Yes | No  | No  | 0.229  | 0.374 | -1.959 | -5.276 |
| 55 | Theaflavin                        | -2.892 | 0.141  | 65.009 | -2.735 | Yes | Yes | Yes | 0.679  | 0.2   | -1.577 | -4.33  |
| 56 | Umbelliferone                     | -2.131 | 1.206  | 94.551 | -2.6   | No  | No  | No  | 0.032  | 0.432 | -0.278 | -2.741 |

**Interpretation of results:** If the Caco2 permeability value is higher than 0.90, a compound is considered to have a high Caco-2 permeability. A compound with a value of less than 30% is considered to be poorly absorbed in the human intestinal. If a compound has a value less than -2.5 is considered to have a low skin permeability. The compounds with values < -3 cannot penetrate the central nervous system while values > -2 are considered to penetrate the central nervous system. The compounds with values logBB < -1 are poorly distributed to the brain while values logBB > 0.3 are considered to cross the blood-brain barrier readily. VDss is considered low if below 0.71 L/kg (log VDss < -0.15) and high if above 2.81 L/kg (log VDss > 0.45).

**Table S4.** Pharmacokinetics properties of selected compounds

|    | Compounds                         | GI absorp<br>tion | BBB permeant | Pgp substrate | CYP1A2 inhibitor | CYP2C19 inhibitor | CYP2C9 inhibitor | CYP2D6 inhibitor | CYP3A4 inhibitor | log Kp (cm/s) |
|----|-----------------------------------|-------------------|--------------|---------------|------------------|-------------------|------------------|------------------|------------------|---------------|
| 1  | Gallic acid                       | High              | No           | No            | No               | No                | No               | No               | Yes              | -6.84         |
| 2  | Protocatechuic acid               | High              | No           | No            | No               | No                | No               | No               | Yes              | -6.42         |
| 3  | Protocatechuic acid 4-O-glucoside | Low               | No           | No            | No               | No                | No               | No               | No               | -9.21         |
| 4  | Caffeic acid                      | High              | No           | No            | No               | No                | No               | No               | No               | -6.58         |
| 5  | Piceatannol                       | High              | No           | No            | Yes              | No                | Yes              | No               | Yes              | -5.76         |
| 6  | Rosmarinic acid                   | Low               | No           | No            | No               | No                | No               | No               | No               | -6.82         |
| 7  | p-Hydroxybenzoic acid             | High              | Yes          | No            | No               | No                | No               | No               | No               | -6.02         |
| 8  | p-Coumaric acid                   | High              | Yes          | No            | No               | No                | No               | No               | No               | -6.26         |
| 9  | p-Coumaric acid 4-O-glucoside     | Low               | No           | No            | No               | No                | No               | No               | No               | -8.7          |
| 10 | Kaempferol 3-O-glucuronide        | Low               | No           | Yes           | No               | No                | No               | No               | No               | -8.44         |
| 11 | Cinnamic acid                     | High              | Yes          | No            | No               | No                | No               | No               | No               | -5.69         |
| 12 | Coumarin                          | High              | Yes          | No            | Yes              | No                | No               | No               | No               | -6.2          |
| 13 | Procyanidin trimer C1             | Low               | No           | Yes           | No               | No                | No               | No               | No               | -9.24         |
| 14 | Rosmanol                          | High              | No           | Yes           | No               | No                | No               | Yes              | No               | -5.99         |
| 15 | Carnosol                          | High              | Yes          | Yes           | No               | No                | Yes              | No               | No               | -5.21         |
| 16 | Carnosic acid                     | High              | No           | No            | No               | No                | Yes              | No               | No               | -4.86         |
| 17 | Diosmin                           | Low               | No           | Yes           | No               | No                | No               | No               | No               | -9.91         |
| 18 | Hesperidin                        | Low               | No           | Yes           | No               | No                | No               | No               | No               | -10.12        |
| 19 | Mellein                           | High              | Yes          | No            | Yes              | No                | No               | No               | No               | -5.65         |
| 20 | Nobiletin                         | High              | No           | No            | No               | No                | Yes              | No               | Yes              | -6.62         |
| 21 | Scopoletin                        | High              | Yes          | No            | Yes              | No                | No               | No               | No               | -6.39         |
| 22 | Secoisolariciresinol-             | Low               | No           | Yes           | No               | No                | No               | No               | No               | -7.8          |

|    |                              |      |     |     |     |    |     |     |     |        |
|----|------------------------------|------|-----|-----|-----|----|-----|-----|-----|--------|
|    | sesquilignan                 |      |     |     |     |    |     |     |     |        |
| 23 | Matairesinol                 | High | No  | No  | No  | No | No  | Yes | Yes | -6.17  |
| 24 | Lariciresinol                | High | No  | Yes | No  | No | No  | Yes | No  | -6.79  |
| 25 | Lariciresinol-sesquilignan   | Low  | No  | No  | No  | No | No  | No  | Yes | -7.87  |
| 26 | Epicatechin                  | High | No  | Yes | No  | No | No  | No  | No  | -7.82  |
| 27 | Gallocatechin                | High | No  | No  | No  | No | No  | No  | No  | -8.17  |
| 28 | 1 2-Diferuloylgentiobiose    | Low  | No  | Yes | No  | No | No  | No  | No  | -10.67 |
| 29 | 3 7-Dimethylquercetin        | Low  | No  | No  | No  | No | No  | No  | No  | -8.41  |
| 30 | 3-Caffeoylquinic acid        | High | No  | No  | Yes | No | Yes | Yes | Yes | -6.16  |
| 31 | 3-Feruloylquinic acid        | Low  | No  | No  | No  | No | No  | No  | No  | -8.62  |
| 32 | 3-p-Coumaroylquinic acid     | Low  | No  | No  | No  | No | No  | No  | No  | -8.41  |
| 33 | 3-Sinapoylquinic acid        | Low  | No  | Yes | No  | No | No  | No  | No  | -8.82  |
| 34 | 6-O-Malonylgenistin          | Low  | No  | Yes | No  | No | No  | No  | No  | -9.05  |
| 35 | 6-O-Malonylglycitin          | Low  | No  | Yes | No  | No | No  | No  | No  | -9.3   |
| 36 | Caffeic acid 4-O-glucuronide | Low  | No  | No  | No  | No | No  | No  | No  | -8.75  |
| 37 | Daidzein 7-O-glucuronide     | Low  | No  | No  | No  | No | No  | No  | No  | -8.28  |
| 38 | Equol 7-O-glucuronide        | Low  | No  | Yes | No  | No | No  | No  | No  | -7.85  |
| 39 | Esculin                      | Low  | No  | No  | No  | No | No  | No  | No  | -8.81  |
| 40 | Ferulic acid                 | High | Yes | No  | No  | No | No  | No  | No  | -6.41  |
| 41 | Glycitein 7-O-glucuronide    | Low  | No  | No  | No  | No | No  | No  | No  | -8.48  |
| 42 | Kaempferide                  | High | No  | No  | Yes | No | No  | Yes | Yes | -6.56  |
| 43 | Medioresinol                 | High | No  | Yes | No  | No | No  | Yes | No  | -7.07  |
| 44 | Myricetin 3-O-rhamnoside     | Low  | No  | No  | No  | No | No  | No  | No  | -8.77  |
| 45 | Naringin                     | Low  | No  | Yes | No  | No | No  | No  | No  | -10.15 |

|    |                                   |      |     |     |     |    |     |    |     |        |
|----|-----------------------------------|------|-----|-----|-----|----|-----|----|-----|--------|
| 46 | Neerocitrin                       | Low  | No  | Yes | No  | No | No  | No | No  | -10.51 |
| 47 | Procyandin B2                     | Low  | No  | No  | No  | No | No  | No | Yes | -8.15  |
| 48 | Pyrogallol                        | High | Yes | No  | No  | No | No  | No | Yes | -6.7   |
| 49 | Quercetin 3-O-xylosyl-glucuronide | Low  | No  | Yes | No  | No | No  | No | No  | -10.44 |
| 50 | Rhoifolin                         | Low  | No  | Yes | No  | No | No  | No | No  | -9.94  |
| 51 | Salvianolic acid B                | Low  | No  | No  | No  | No | No  | No | No  | -7.86  |
| 52 | Salvianolic acid C                | Low  | No  | No  | No  | No | Yes | No | No  | -6.41  |
| 53 | Sinapic acid                      | High | No  | No  | No  | No | No  | No | No  | -6.63  |
| 54 | Taxifolin 4 7-diglucoside         | Low  | No  | No  | No  | No | No  | No | No  | -12.02 |
| 55 | Theaflavin                        | Low  | No  | No  | No  | No | Yes | No | Yes | -8.05  |
| 56 | Umbelliferone                     | High | Yes | No  | Yes | No | No  | No | No  | -6.17  |

**Table S5.** Radar bioavailability properties of selected compounds

|   | Compounds                         | MW     | Fraction Csp3 | #Rotatable bonds | TPSA   | XLOGP3 | ESOL Log S |
|---|-----------------------------------|--------|---------------|------------------|--------|--------|------------|
| 1 | Gallic acid                       | 170.12 | 0             | 1                | 97.99  | 0.7    | -1.64      |
| 2 | Protocatechuic acid               | 154.12 | 0             | 1                | 77.76  | 1.15   | -1.86      |
| 3 | Protocatechuic acid 4-O-glucoside | 316.26 | 0.46          | 4                | 156.91 | -1.38  | -0.87      |
| 4 | Caffeic acid                      | 180.16 | 0             | 2                | 77.76  | 1.15   | -1.89      |
| 5 | Piceatannol                       | 244.24 | 0             | 2                | 80.92  | 2.86   | -3.52      |
| 6 | Rosmarinic acid                   | 360.31 | 0.11          | 7                | 144.52 | 2.36   | -3.44      |
| 7 | p-Hydroxybenzoic acid             | 138.12 | 0             | 1                | 57.53  | 1.58   | -2.07      |
| 8 | p-Coumaric acid                   | 164.16 | 0             | 2                | 57.53  | 1.46   | -2.02      |
| 9 | p-Coumaric acid 4-O-glucoside     | 326.3  | 0.4           | 5                | 136.68 | -0.57  | -1.37      |

|    |                                    |        |      |    |        |       |       |
|----|------------------------------------|--------|------|----|--------|-------|-------|
| 10 | Kaempferol 3-O-glucuronide         | 462.36 | 0.24 | 4  | 207.35 | 0.96  | -3.41 |
| 11 | Cinnamic acid                      | 148.16 | 0    | 2  | 37.3   | 2.13  | -2.37 |
| 12 | Coumarin                           | 146.14 | 0    | 0  | 30.21  | 1.39  | -2.29 |
| 13 | Procyanidin trimer C1              | 866.77 | 0.2  | 5  | 331.14 | 3.31  | -7.39 |
| 14 | Rosmanol                           | 346.42 | 0.65 | 1  | 86.99  | 3.41  | -4.25 |
| 15 | Carnosol                           | 330.42 | 0.65 | 1  | 66.76  | 4.38  | -4.77 |
| 16 | Carnosic acid                      | 332.43 | 0.65 | 2  | 77.76  | 4.89  | -5.03 |
| 17 | Diosmin                            | 608.54 | 0.46 | 7  | 238.2  | 0.14  | -3.51 |
| 18 | Hesperidin                         | 610.56 | 0.54 | 7  | 234.29 | -0.14 | -3.28 |
| 19 | Mellein                            | 178.18 | 0.3  | 0  | 46.53  | 2.44  | -2.82 |
| 20 | Nobiletin                          | 402.39 | 0.29 | 7  | 85.59  | 3.01  | -4.18 |
| 21 | Scopoletin                         | 192.17 | 0.1  | 1  | 59.67  | 1.53  | -2.46 |
| 22 | Secoisolariciresinol-sesquillignan | 558.62 | 0.4  | 15 | 158.3  | 2.69  | -4.34 |
| 23 | Matairesinol                       | 358.39 | 0.35 | 6  | 85.22  | 3.26  | -4.06 |
| 24 | Lariciresinol                      | 360.4  | 0.4  | 6  | 88.38  | 2.4   | -3.53 |
| 25 | Lariciresinol-sesquillignan        | 556.6  | 0.4  | 12 | 147.3  | 2.57  | -4.45 |
| 26 | Epicatechin                        | 290.27 | 0.2  | 1  | 110.38 | 0.36  | -2.22 |
| 27 | Gallocatechin                      | 306.27 | 0.2  | 1  | 130.61 | 0     | -2.08 |
| 28 | 1 2-Diferuloylgentiobiose          | 694.63 | 0.44 | 14 | 260.59 | -0.19 | -3.28 |
| 29 | 3 7-Dimethylquercetin              | 338.31 | 0.38 | 5  | 144.52 | -0.07 | -1.75 |
| 30 | 3-Caffeoylquinic acid              | 330.29 | 0.12 | 3  | 109.36 | 3.04  | -4.1  |
| 31 | 3-Feruloylquinic acid              | 368.34 | 0.41 | 6  | 153.75 | -0.1  | -1.84 |
| 32 | 3-p-Coumaroylquinic acid           | 338.31 | 0.38 | 5  | 144.52 | -0.07 | -1.75 |
| 33 | 3-Sinapoylquinic acid              | 398.36 | 0.44 | 7  | 162.98 | -0.13 | -1.92 |
| 34 | 6-O-Malonylgenistin                | 518.42 | 0.29 | 8  | 213.42 | 0.58  | -3.21 |
| 35 | 6-O-Malonylglycitin                | 532.45 | 0.32 | 9  | 202.42 | 0.35  | -3.08 |
| 36 | Caffeic acid 4-O-glucuronide       | 356.28 | 0.33 | 5  | 173.98 | -0.39 | -1.65 |
| 37 | Daidzein 7-O-glucuronide           | 430.36 | 0.24 | 4  | 166.89 | 0.91  | -3.2  |
| 38 | Equol 7-O-glucuronide              | 418.39 | 0.38 | 4  | 145.91 | 1.41  | -3.35 |
| 39 | Esculin                            | 340.28 | 0.4  | 3  | 149.82 | -0.61 | -1.68 |

|    |                                   |        |      |    |        |       |       |
|----|-----------------------------------|--------|------|----|--------|-------|-------|
| 40 | Ferulic acid                      | 194.18 | 0.1  | 3  | 66.76  | 1.51  | -2.11 |
| 41 | Glycitein 7-O-glucuronide         | 460.39 | 0.27 | 5  | 176.12 | 0.88  | -3.28 |
| 42 | Kaempferide                       | 300.26 | 0.06 | 2  | 100.13 | 2.22  | -3.51 |
| 43 | Medioresinol                      | 388.41 | 0.43 | 5  | 86.61  | 2.25  | -3.65 |
| 44 | Myricetin 3-O-rhamnoside          | 464.38 | 0.29 | 3  | 210.51 | 0.51  | -3.2  |
| 45 | Naringin                          | 580.53 | 0.52 | 6  | 225.06 | -0.44 | -2.98 |
| 46 | Neohesperidin                     | 596.53 | 0.52 | 6  | 245.29 | -0.8  | -2.85 |
| 47 | Procyanidin B2                    | 578.52 | 0.2  | 3  | 220.76 | 2.37  | -5.14 |
| 48 | Pyrogallol                        | 126.11 | 0    | 0  | 60.69  | 0.52  | -1.44 |
| 49 | Quercetin 3-O-xylosyl-glucuronide | 610.47 | 0.38 | 7  | 286.5  | -0.58 | -3.07 |
| 50 | Rhoifolin                         | 578.52 | 0.44 | 6  | 228.97 | -0.16 | -3.22 |
| 51 | Salvianolic acid B                | 718.61 | 0.17 | 14 | 278.04 | 3.98  | -6.22 |
| 52 | Salvianolic acid C                | 492.43 | 0.08 | 8  | 177.89 | 4.07  | -5.36 |
| 53 | Sinapic acid                      | 224.21 | 0.18 | 4  | 75.99  | 1.46  | -2.16 |
| 54 | Taxifolin 4 7-diglucoside         | 628.53 | 0.52 | 7  | 285.75 | -2.66 | -1.8  |
| 55 | Theaflavin                        | 564.49 | 0.21 | 2  | 217.6  | 2.38  | -5.12 |
| 56 | Umbelliferone                     | 162.14 | 0    | 0  | 50.44  | 1.58  | -2.46 |

(Lipophilicity: XLOGP3 between -0.7 and +5.0, size: MW between 150 and 500 g/mol, polarity: TPSA between 20 and 130Å<sup>2</sup>, solubility: log S not higher than 6, saturation: fraction of carbons in the sp<sup>3</sup> hybridization not less than 0.25, and flexibility: no more than nine rotatable bonds; topological polar surface area (TPSA), Only quinic acid, satisfied all parameters for drug-likeness (oral bioavailability)

**Table S6.** Metabolism and excretion of selected compounds

|    | <b>Compounds</b>                     | CYP2D6<br>substrate | CYP3A4<br>substrate | CYP1A2<br>inhibitor | CYP2C19<br>inhibitor | CYP2C9<br>inhibitor | CYP2D6<br>inhibitor | CYP3A4<br>inhibitor | Total<br>Clearanc<br>e | Renal OCT2<br>substrate |
|----|--------------------------------------|---------------------|---------------------|---------------------|----------------------|---------------------|---------------------|---------------------|------------------------|-------------------------|
| 1  | Gallic acid                          | No                  | No                  | No                  | No                   | No                  | No                  | No                  | 0.518                  | No                      |
| 2  | Protocatechuic acid                  | No                  | No                  | No                  | No                   | No                  | No                  | No                  | 0.551                  | No                      |
| 3  | Protocatechuic acid<br>4-O-glucoside | No                  | No                  | No                  | No                   | No                  | No                  | No                  | 0.552                  | No                      |
| 4  | Caffeic acid                         | No                  | No                  | No                  | No                   | No                  | No                  | No                  | 0.508                  | No                      |
| 5  | Piceatannol                          | No                  | Yes                 | Yes                 | Yes                  | No                  | Yes                 | No                  | 0.004                  | No                      |
| 6  | Rosmarinic acid                      | No                  | No                  | No                  | No                   | No                  | No                  | No                  | 0.25                   | No                      |
| 7  | p-Hydroxybenzoic<br>acid             | No                  | No                  | No                  | No                   | No                  | No                  | No                  | 0.593                  | No                      |
| 8  | p-Coumaric acid                      | No                  | No                  | No                  | No                   | No                  | No                  | No                  | 0.662                  | No                      |
| 9  | p-Coumaric acid 4-O-<br>glucoside    | No                  | No                  | No                  | No                   | No                  | No                  | No                  | 0.278                  | No                      |
| 10 | Kaempferol 3-O-<br>glucuronide       | No                  | No                  | No                  | No                   | No                  | No                  | No                  | 0.503                  | No                      |
| 11 | Cinnamic acid                        | No                  | No                  | No                  | No                   | No                  | No                  | No                  | 0.781                  | No                      |
| 12 | Coumarin                             | No                  | No                  | Yes                 | No                   | No                  | No                  | No                  | 0.97                   | No                      |
| 13 | Procyanidin trimer<br>C1             | No                  | No                  | No                  | No                   | No                  | No                  | No                  | -3.326                 | No                      |
| 14 | Rosmanol                             | No                  | No                  | No                  | No                   | No                  | No                  | No                  | 0.289                  | No                      |
| 15 | Carnosol                             | No                  | Yes                 | No                  | Yes                  | No                  | No                  | No                  | 0.28                   | No                      |
| 16 | Carnosic acid                        | No                  | No                  | No                  | No                   | No                  | No                  | No                  | 0.379                  | No                      |
| 17 | Diosmin                              | No                  | No                  | No                  | No                   | No                  | No                  | No                  | -0.113                 | No                      |
| 18 | Hesperidin                           | No                  | No                  | No                  | No                   | No                  | No                  | No                  | 0.211                  | No                      |
| 19 | Mellein                              | No                  | No                  | No                  | No                   | No                  | No                  | No                  | 0.584                  | No                      |
| 20 | Nobiletin                            | No                  | Yes                 | Yes                 | Yes                  | Yes                 | No                  | Yes                 | 0.789                  | No                      |
| 21 | Scopoletin                           | No                  | No                  | Yes                 | No                   | No                  | No                  | No                  | 0.73                   | No                      |

|    |                                      |    |     |     |     |     |    |     |       |    |
|----|--------------------------------------|----|-----|-----|-----|-----|----|-----|-------|----|
| 22 | Secoisolariciresinol<br>sesquilignan | No | Yes | No  | No  | No  | No | Yes | 0.202 | No |
| 23 | Matairesinol                         | No | Yes | Yes | Yes | Yes | No | Yes | 0.147 | No |
| 24 | Lariciresinol                        | No | Yes | No  | Yes | No  | No | Yes | 0.139 | No |
| 25 | Lariciresinol-<br>sesquilignan       | No | Yes | No  | No  | Yes | No | Yes | 0.094 | No |
| 26 | Epicatechin                          | No | No  | No  | No  | No  | No | No  | 0.183 | No |
| 27 | Galocatechin                         | No | No  | No  | No  | No  | No | No  | 0.328 | No |
| 28 | 1,2-<br>Diferuloylgentiobios<br>e    | No | No  | No  | No  | No  | No | No  | 0.463 | No |
| 29 | 3,7-<br>Dimethylquercetin            | No | No  | No  | No  | No  | No | No  | 0.453 | No |
| 30 | 3-Caffeoylquinic acid                | No | No  | Yes | Yes | No  | No | No  | 0.531 | No |
| 31 | 3-Feruloylquinic acid                | No | No  | No  | No  | No  | No | No  | 0.393 | No |
| 32 | 3-p-Coumaroylquinic<br>acid          | No | No  | No  | No  | No  | No | No  | 0.453 | No |
| 33 | 3-Sinapoylquinic acid                | No | No  | No  | No  | No  | No | No  | 0.727 | No |
| 34 | 6''-O-<br>Malonylgenistin            | No | No  | No  | No  | No  | No | No  | 0.226 | No |
| 35 | 6''-O-Malonylglycitin                | No | No  | No  | No  | No  | No | No  | 0.277 | No |
| 36 | Caffeic acid 4-O-<br>glucuronide     | No | No  | No  | No  | No  | No | No  | 0.194 | No |
| 37 | Daidzein 7-O-<br>glucuronide         | No | No  | No  | No  | No  | No | No  | 0.067 | No |
| 38 | Equol 7-O-<br>glucuronide            | No | No  | No  | No  | No  | No | No  | 0.529 | No |
| 39 | Esculin                              | No | No  | No  | No  | No  | No | No  | 0.651 | No |
| 40 | Ferulic acid                         | No | No  | No  | No  | No  | No | No  | 0.623 | No |
| 41 | Glycitein 7-O-<br>glucuronide        | No | No  | No  | No  | No  | No | No  | 0.062 | No |
| 42 | Kaempferide                          | No | No  | Yes | Yes | Yes | No | No  | 0.569 | No |

|    |                                   |    |     |     |     |     |    |     |        |     |
|----|-----------------------------------|----|-----|-----|-----|-----|----|-----|--------|-----|
| 43 | Medioresinol                      | No | Yes | No  | Yes | Yes | No | Yes | 0.05   | No  |
| 44 | Myricetin 3-O-rhamnoside          | No | No  | No  | No  | No  | No | No  | 0.303  | No  |
| 45 | Naringin                          | No | No  | No  | No  | No  | No | No  | 0.318  | No  |
| 46 | Neoeriocitrin                     | No | No  | No  | No  | No  | No | No  | 0.125  | No  |
| 47 | Procyanidin B2                    | No | No  | No  | No  | No  | No | No  | -0.085 | Yes |
| 48 | Pyrogallol                        | No | No  | No  | No  | No  | No | No  | 0.104  | No  |
| 49 | Quercetin 3-O-xylosyl-glucuronide | No | No  | No  | No  | No  | No | No  | -0.403 | No  |
| 50 | Rhoifolin                         | No | No  | No  | No  | No  | No | No  | -0.005 | No  |
| 51 | Salvianolic acid B                | No | No  | No  | No  | No  | No | No  | -0.609 | No  |
| 52 | Salvianolic acid C                | No | Yes | No  | No  | No  | No | No  | 0.132  | No  |
| 53 | Sinapic acid                      | No | No  | No  | No  | No  | No | No  | 0.718  | No  |
| 54 | Taxifolin 4',7-diglucoside        | No | No  | No  | No  | No  | No | No  | 0.168  | No  |
| 55 | Theaflavin                        | No | No  | No  | No  | No  | No | No  | 0.081  | No  |
| 56 | Umbelliferone                     | No | No  | Yes | No  | No  | No | No  | 0.706  | No  |

**Table S7** Predicted toxicity of abundant phenolic compounds

|    | <b>Compounds</b>                  | AME<br>S<br>toxicity | Max.<br>tolerated<br>dose (human) | hERG<br>I<br>inhibitor | hERG<br>II<br>inhibitor | Oral Rat<br>Acute<br>Toxicity<br>(LD50) | Oral Rat<br>Chronic<br>Toxicity<br>(LOAEL) | Hepat<br>otoxici<br>ty | Skin<br>Sensitis<br>ation | <i>T.Pyrifor<br>mis</i><br>toxicity | Minno<br>w<br>toxicit<br>y |
|----|-----------------------------------|----------------------|-----------------------------------|------------------------|-------------------------|-----------------------------------------|--------------------------------------------|------------------------|---------------------------|-------------------------------------|----------------------------|
| 1  | Gallic acid                       | No                   | 0.7                               | No                     | No                      | 2.218                                   | 3.06                                       | No                     | No                        | 0.285                               | 3.188                      |
| 2  | Protocatechuic acid               | No                   | 0.814                             | No                     | No                      | 2.423                                   | 2.021                                      | No                     | No                        | 0.273                               | 2.451                      |
| 3  | Protocatechuic acid 4-O-glucoside | No                   | 0.592                             | No                     | No                      | 2.576                                   | 3.661                                      | No                     | No                        | 0.285                               | 5.526                      |
| 4  | Caffeic acid                      | No                   | 1.145                             | No                     | No                      | 2.383                                   | 2.092                                      | No                     | No                        | 0.293                               | 2.246                      |
| 5  | Piceatannol                       | No                   | 0.338                             | No                     | No                      | 2.529                                   | 0.953                                      | No                     | No                        | 0.563                               | 2.161                      |
| 6  | Rosmarinic acid                   | No                   | 0.152                             | No                     | No                      | 2.811                                   | 2.907                                      | No                     | No                        | 0.302                               | 2.698                      |
| 7  | p-Hydroxybenzoic acid             | No                   | 0.846                             | No                     | No                      | 2.255                                   | 2.483                                      | No                     | No                        | 0.268                               | 1.812                      |
| 8  | p-Coumaric acid                   | No                   | 1.111                             | No                     | No                      | 2.155                                   | 2.534                                      | No                     | No                        | 0.319                               | 1.607                      |
| 9  | p-Coumaric acid 4-O-glucoside     | No                   | 0.492                             | No                     | No                      | 2.414                                   | 3.751                                      | No                     | No                        | 0.285                               | 3.798                      |
| 10 | Kaempferol 3-O-glucuronide        | No                   | 0.46                              | No                     | No                      | 2.513                                   | 4.641                                      | No                     | No                        | 0.285                               | 6.898                      |
| 11 | Cinnamic acid                     | No                   | 1.11                              | No                     | No                      | 2.094                                   | 2.651                                      | No                     | No                        | 0.247                               | 1.719                      |
| 12 | Coumarin                          | No                   | 0.435                             | No                     | No                      | 2.112                                   | 1.903                                      | No                     | No                        | 0.365                               | 1.555                      |
| 13 | Procyanidin trimer C1             | No                   | 0.438                             | No                     | Yes                     | 2.482                                   | 7.463                                      | No                     | No                        | 0.285                               | 14.258                     |
| 14 | Rosmanol                          | No                   | 0.331                             | No                     | Yes                     | 1.977                                   | 2.547                                      | Yes                    | No                        | 0.329                               | 0.285                      |
| 15 | Carnosol                          | No                   | 0.227                             | No                     | No                      | 2.192                                   | 1.909                                      | No                     | No                        | 0.405                               | -0.636                     |
| 16 | Carnosic acid                     | No                   | 0.345                             | No                     | No                      | 2.891                                   | 1.972                                      | No                     | No                        | 0.285                               | -0.627                     |

|    |                                 |    |        |    |     |       |       |     |    |       |       |
|----|---------------------------------|----|--------|----|-----|-------|-------|-----|----|-------|-------|
| 17 | Diosmin                         | No | 0.565  | No | Yes | 2.512 | 3.343 | No  | No | 0.285 | 5.348 |
| 18 | Hesperidin                      | No | 0.525  | No | Yes | 2.506 | 3.167 | No  | No | 0.285 | 7.131 |
| 19 | Mellein                         | No | 0.205  | No | No  | 2.022 | 2.137 | Yes | No | 0.857 | 1.865 |
| 20 | Nobiletin                       | No | 0.443  | No | No  | 2.459 | 0.82  | No  | No | 0.315 | 0.686 |
| 21 | Scopoletin                      | No | 0.614  | No | No  | 1.95  | 1.378 | No  | No | 0.516 | 1.614 |
| 22 | Secoisolariciresinol sesquignan | No | 0.407  | No | Yes | 2.762 | 3.576 | No  | No | 0.285 | 1.742 |
| 23 | Matairesinol                    | No | -0.164 | No | Yes | 1.935 | 2.151 | No  | No | 0.454 | 0.44  |
| 24 | Lariciresinol                   | No | -0.099 | No | Yes | 2     | 2.226 | No  | No | 0.427 | 1.316 |
| 25 | Lariciresinol-sesquignan        | No | 0.114  | No | Yes | 2.444 | 2.416 | No  | No | 0.285 | 2.135 |
| 26 | Epicatechin                     | No | 0.438  | No | No  | 2.428 | 2.5   | No  | No | 0.347 | 3.585 |
| 27 | Gallocatechin                   | No | 0.506  | No | No  | 2.492 | 2.927 | No  | No | 0.286 | 4.235 |
| 28 | 1,2-Diferuloylgentio biose      | No | 0.069  | No | No  | 2.587 | 4.869 | No  | No | 0.285 | 8.945 |
| 29 | 3,7-Dimethylquercetin           | No | -0.09  | No | No  | 1.737 | 2.508 | No  | No | 0.285 | 4.611 |
| 30 | 3-Caffeoylquinic acid           | No | 0.289  | No | No  | 2.351 | 2.646 | No  | No | 0.343 | 1.712 |
| 31 | 3-Feruloylquinic acid           | No | 1.285  | No | No  | 2.025 | 4.485 | No  | No | 0.285 | 4.876 |
| 32 | 3-p-Coumaroylquini c acid       | No | -0.09  | No | No  | 1.737 | 2.508 | No  | No | 0.285 | 4.611 |
| 33 | 3-Sinapoylquinic acid           | No | 0.862  | No | No  | 1.994 | 3.807 | No  | No | 0.285 | 5.242 |
| 34 | 6''-O-Malonylgenistin           | No | 0.507  | No | No  | 2.547 | 3.798 | No  | No | 0.285 | 5.927 |
| 35 | 6''-O-Malonylglucitin           | No | 0.558  | No | No  | 2.595 | 3.324 | No  | No | 0.285 | 3.941 |

|    |                                   |    |        |    |     |       |       |     |    |       |        |
|----|-----------------------------------|----|--------|----|-----|-------|-------|-----|----|-------|--------|
| 36 | Caffeic acid 4-O-glucuronide      | No | 0.656  | No | No  | 2.462 | 4.259 | Yes | No | 0.285 | 4.797  |
| 37 | Daidzein 7-O-glucuronide          | No | 0.663  | No | No  | 2.698 | 4.82  | No  | No | 0.285 | 3.869  |
| 38 | Equol 7-O-glucuronide             | No | 0.295  | No | No  | 2.801 | 4.598 | No  | No | 0.285 | 3.333  |
| 39 | Esculin                           | No | 0.799  | No | No  | 2.299 | 4.157 | Yes | No | 0.285 | 4.925  |
| 40 | Ferulic acid                      | No | 1.082  | No | No  | 2.282 | 2.065 | No  | No | 0.271 | 1.825  |
| 41 | Glycitein 7-O-glucuronide         | No | 0.603  | No | No  | 2.733 | 3.961 | No  | No | 0.285 | 3.2    |
| 42 | Kaempferide                       | No | 0.42   | No | No  | 2.338 | 2.271 | No  | No | 0.336 | 1.737  |
| 43 | Medioresinol                      | No | -0.874 | No | No  | 2.149 | 2.097 | No  | No | 0.355 | 1.253  |
| 44 | Myricetin 3-O-rhamnoside          | No | 0.454  | No | Yes | 2.537 | 3.386 | No  | No | 0.285 | 5.997  |
| 45 | Naringin                          | No | 0.43   | No | Yes | 2.495 | 4.202 | No  | No | 0.285 | 6.042  |
| 46 | Neoeriocitrin                     | No | 0.475  | No | Yes | 2.487 | 4.385 | No  | No | 0.285 | 6.975  |
| 47 | Procyanidin B2                    | No | 0.438  | No | Yes | 2.482 | 4.349 | No  | No | 0.285 | 8.704  |
| 48 | Pyrogallol                        | No | -0.269 | No | No  | 2.049 | 2.374 | No  | No | 0.127 | 2.734  |
| 49 | Quercetin 3-O-xylosyl-glucuronide | No | 0.456  | No | Yes | 2.484 | 4.797 | No  | No | 0.285 | 12.724 |
| 50 | Rhoifolin                         | No | 0.492  | No | Yes | 2.498 | 4.443 | No  | No | 0.285 | 3.865  |
| 51 | Salvianolic acid B                | No | 0.439  | No | No  | 2.482 | 5.46  | No  | No | 0.285 | 4.64   |
| 52 | Salvianolic acid C                | No | 0.499  | No | No  | 2.592 | 3.175 | No  | No | 0.285 | -0.392 |
| 53 | Sinapic acid                      | No | 1.193  | No | No  | 2.24  | 2.324 | No  | No | 0.262 | 2.18   |
| 54 | Taxifolin 4',7-diglucoside        | No | 0.18   | No | Yes | 2.485 | 5.473 | No  | No | 0.285 | 12.41  |
| 55 | Theaflavin                        | No | 0.439  | No | Yes | 2.505 | 4.008 | No  | No | 0.285 | 6.902  |
| 56 | Umbelliferone                     | No | 0.689  | No | No  | 2.047 | 1.751 | Yes | No | 0.546 | 1.714  |

## **Explanations**

### **Minnow toxicity**

LC50 values below 0.5mM ( $\log \text{LC50} < -0.3$ ) are regarded as high acute toxicity.

### ***T. Pyriformis* toxicity**

pIGC50 (negative logarithm of the concentration required to inhibit 50% growth in  $\log \mu\text{g/L}$ ) is considered, with a value  $> -0.5 \log \mu\text{g/L}$  is considered toxic.

**AMES toxicity:** if the AMES value is positive, then the compound will be mutagenic.

Maximum tolerated dose: a value less than is equal to  $0.477 \log(\text{mg/kg/day})$  is considered low and high if greater than  $0.477 \log(\text{mg/kg/day})$
